# Supplementary material for: Novel Topologically Complex Scaffold Derived from Alkaloid Haemanthamine
Source: PubMed Central journal article supplement (PMC6017887; doi:10.3390/molecules23020255), 2018-01-28

# Supporting Information

## Novel Topologically Complex Scaffold Derived from Alkaloid Haemanthamine

Karthik Govindaraju <sup>1</sup>, Marco Masi <sup>2</sup>, Margaux Colin<sup>3</sup>, Veronique Mathieu<sup>3</sup>, Antonio Evidente<sup>2</sup>, Todd W. Hudnall <sup>1,\*</sup> and Alexander Kornienko <sup>1,\*</sup>

<sup>1</sup> Department of Chemistry and Biochemistry, Texas State University, San Marcos, TX 78666

<sup>2</sup> Dipartimento di Scienze Chimiche, Università di Napoli Federico II, Complesso Universitario Monte Sant'Angelo, Via Cintia 4, 80126, Napoli, Italy

<sup>3</sup> Department of Pharmacotherapy and Pharmaceutics, Faculté de Pharmacie, Université Libre de Bruxelles (ULB), Brussels, Belgium

### NMR Spectra

1:  $^1\text{H}$  NMR (400 MHz,  $\text{CDCl}_3$ )

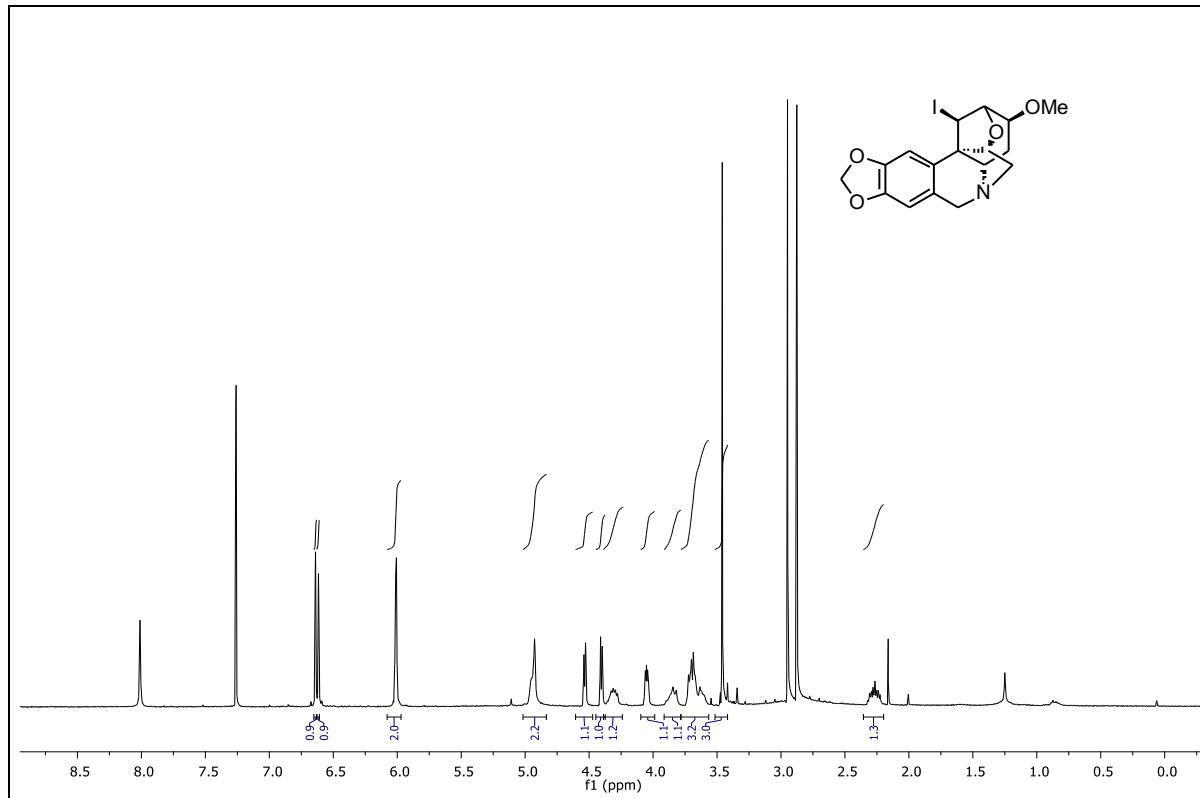

1:  $^{13}\text{C}$  NMR (100 MHz,  $\text{CDCl}_3$ )

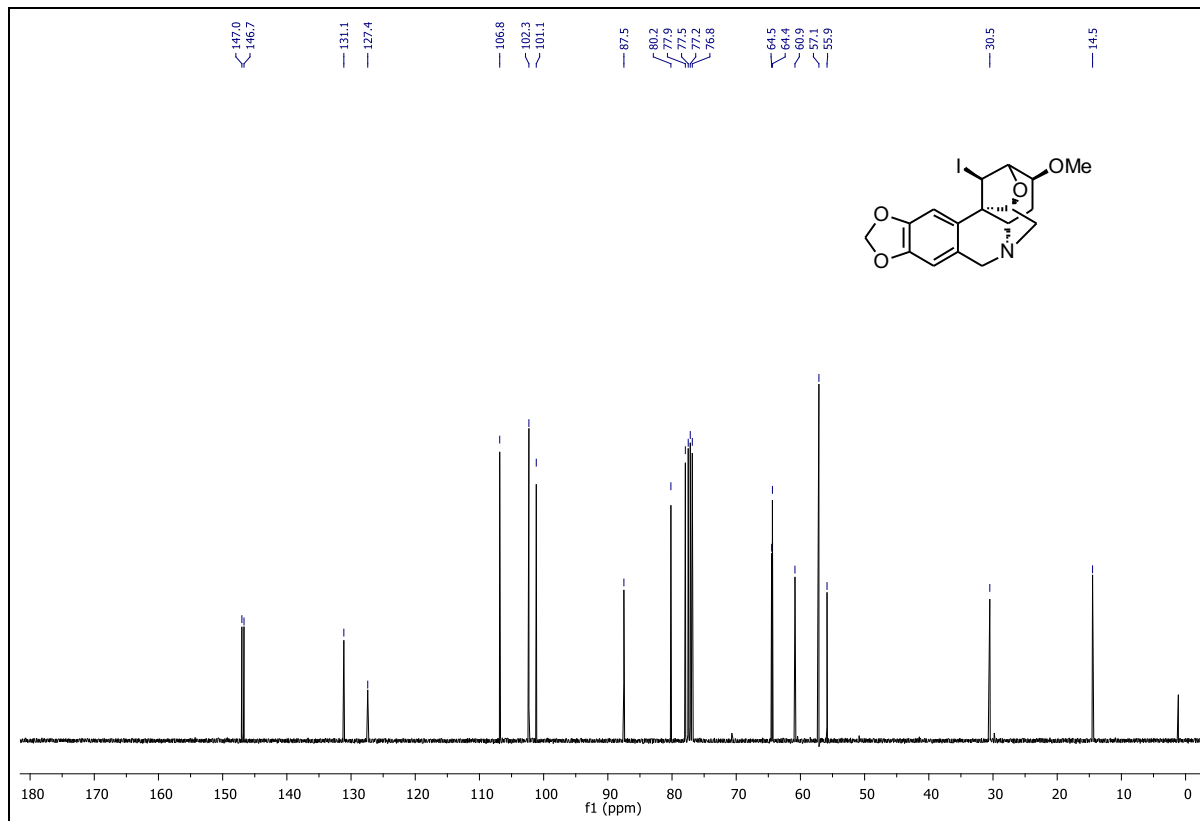

2:  $^1\text{H}$  NMR (400 MHz,  $\text{CDCl}_3$ )

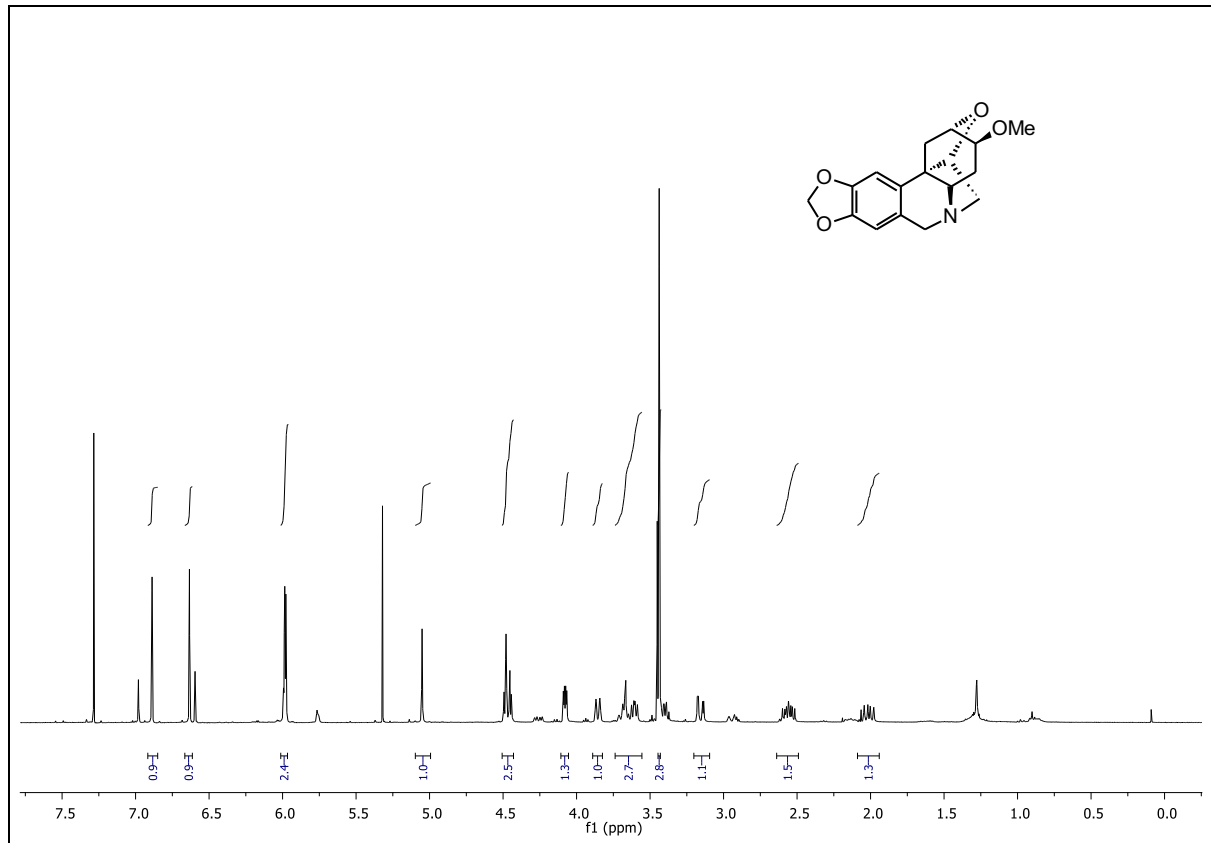

3:  $^1\text{H}$  NMR (400 MHz,  $\text{CDCl}_3$ )

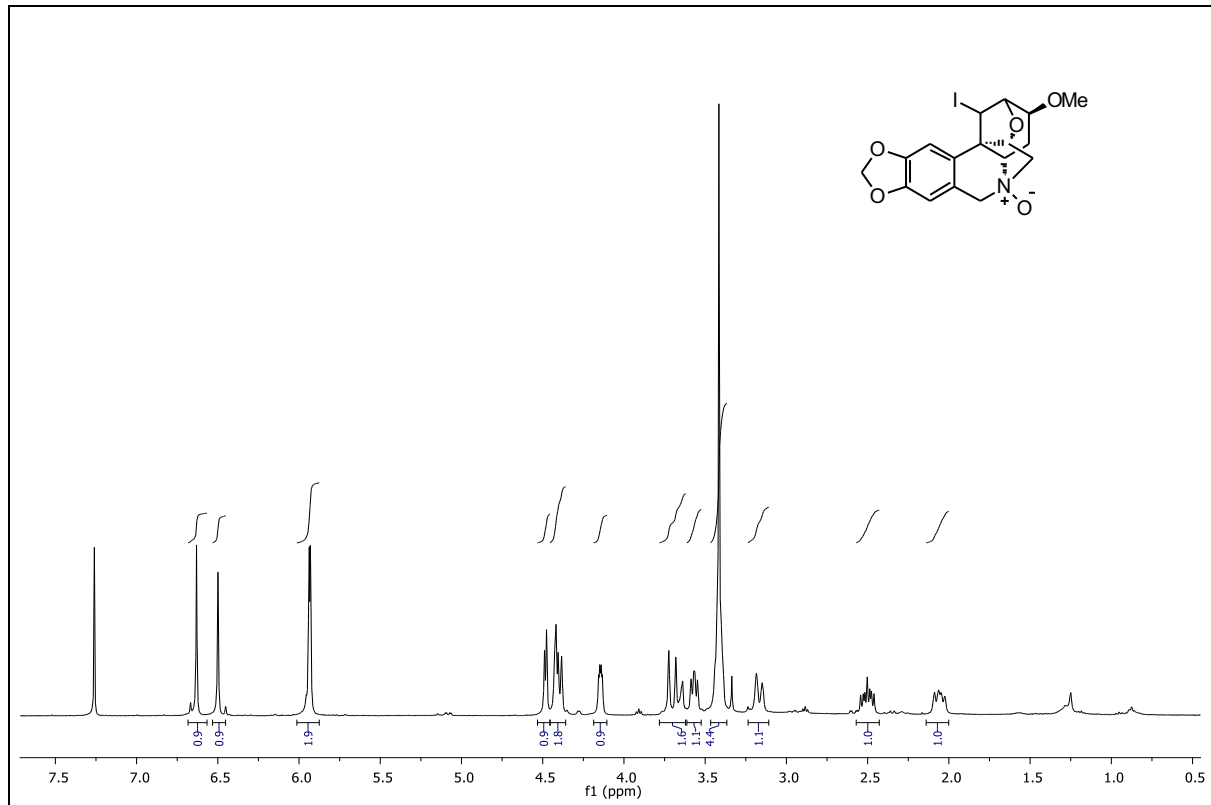

4:  $^1\text{H}$  NMR (400 MHz,  $\text{CDCl}_3$ )

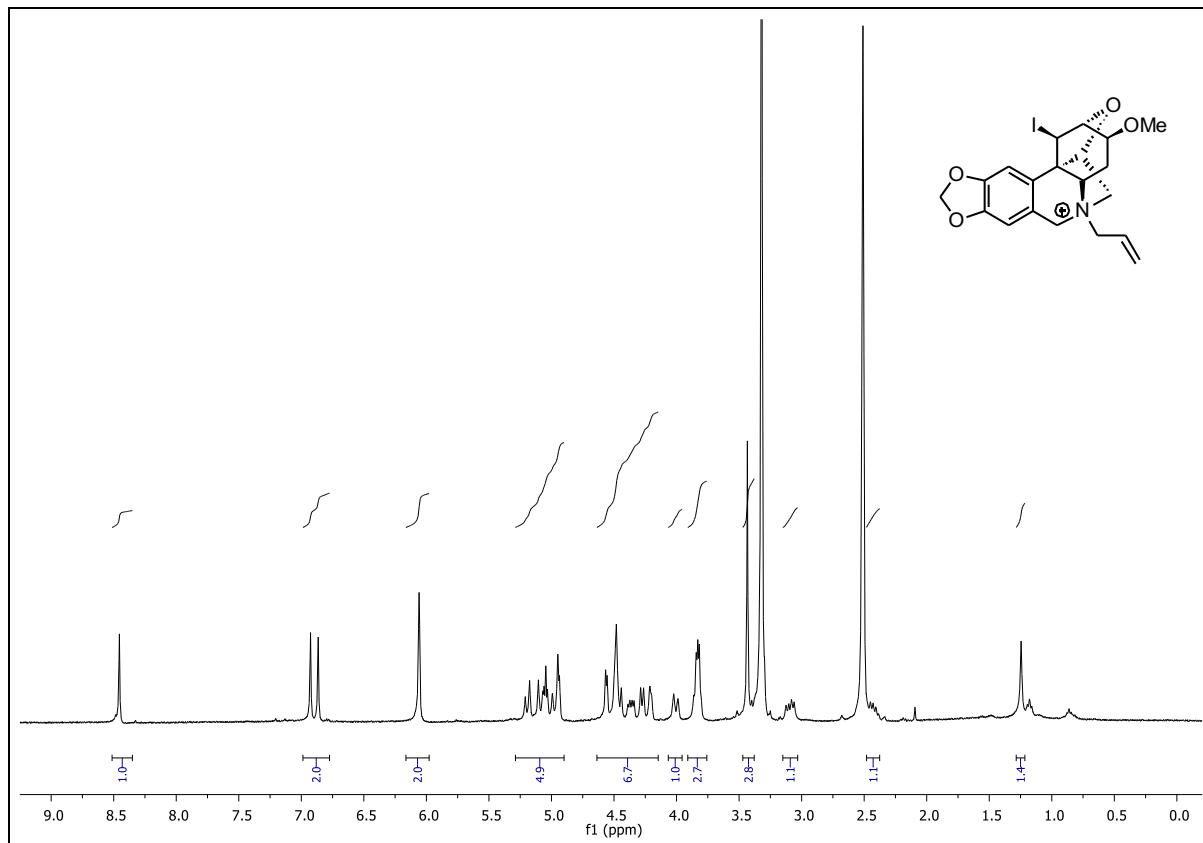

4:  $^{13}\text{C}$  NMR (100 MHz,  $\text{CDCl}_3$ )

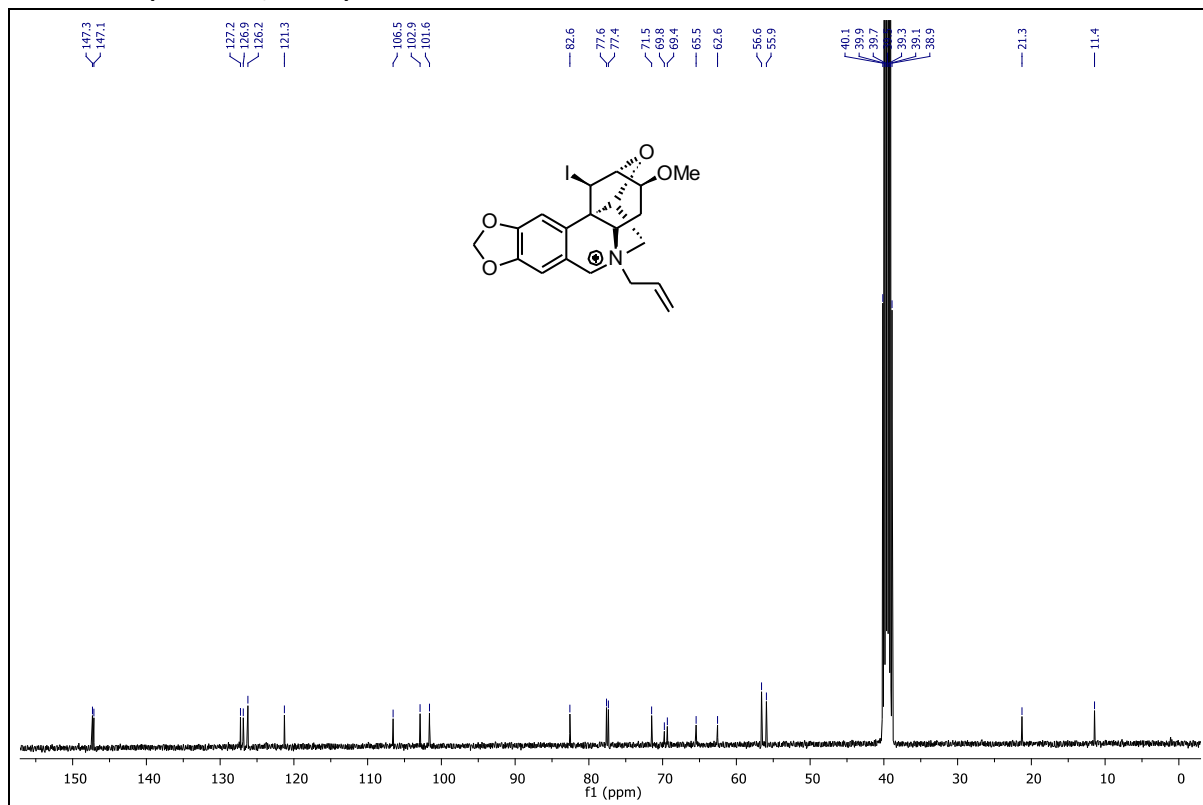

5:  $^1\text{H}$  NMR (400 MHz,  $\text{CDCl}_3$ )

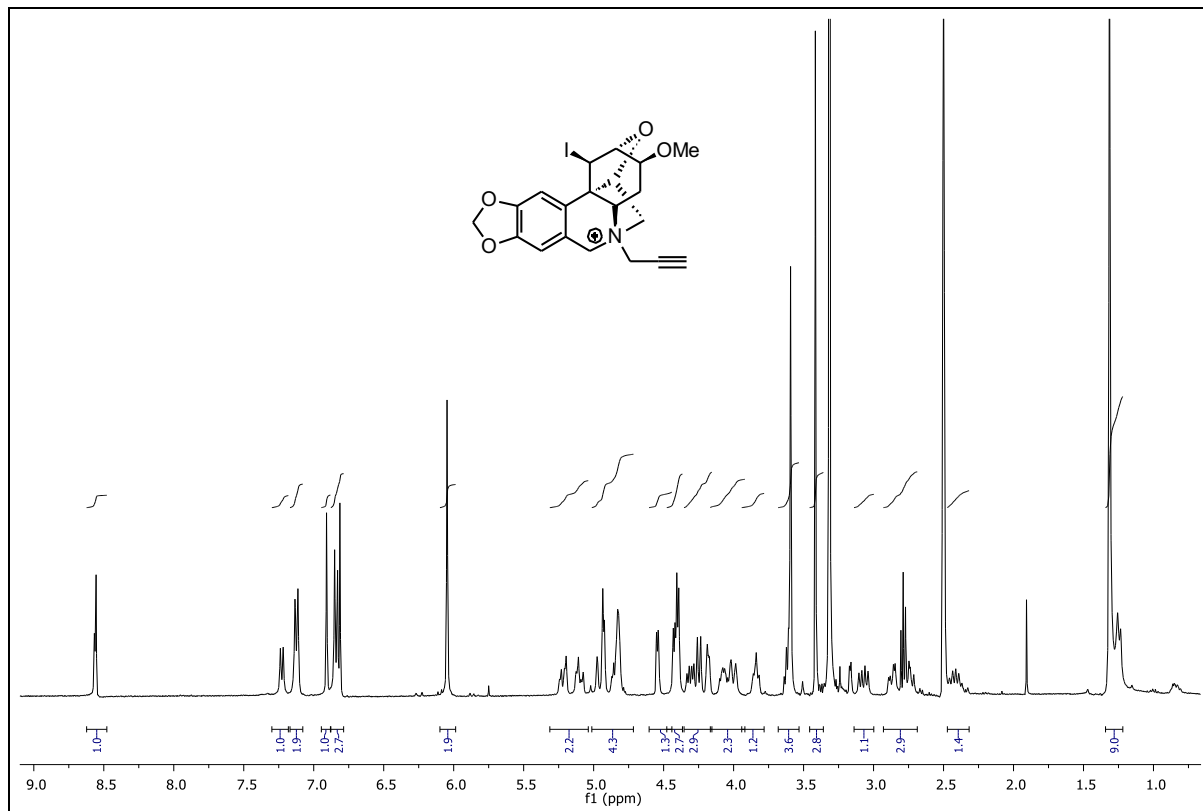

5:  $^{13}\text{C}$  NMR (100 MHz,  $\text{CDCl}_3$ )

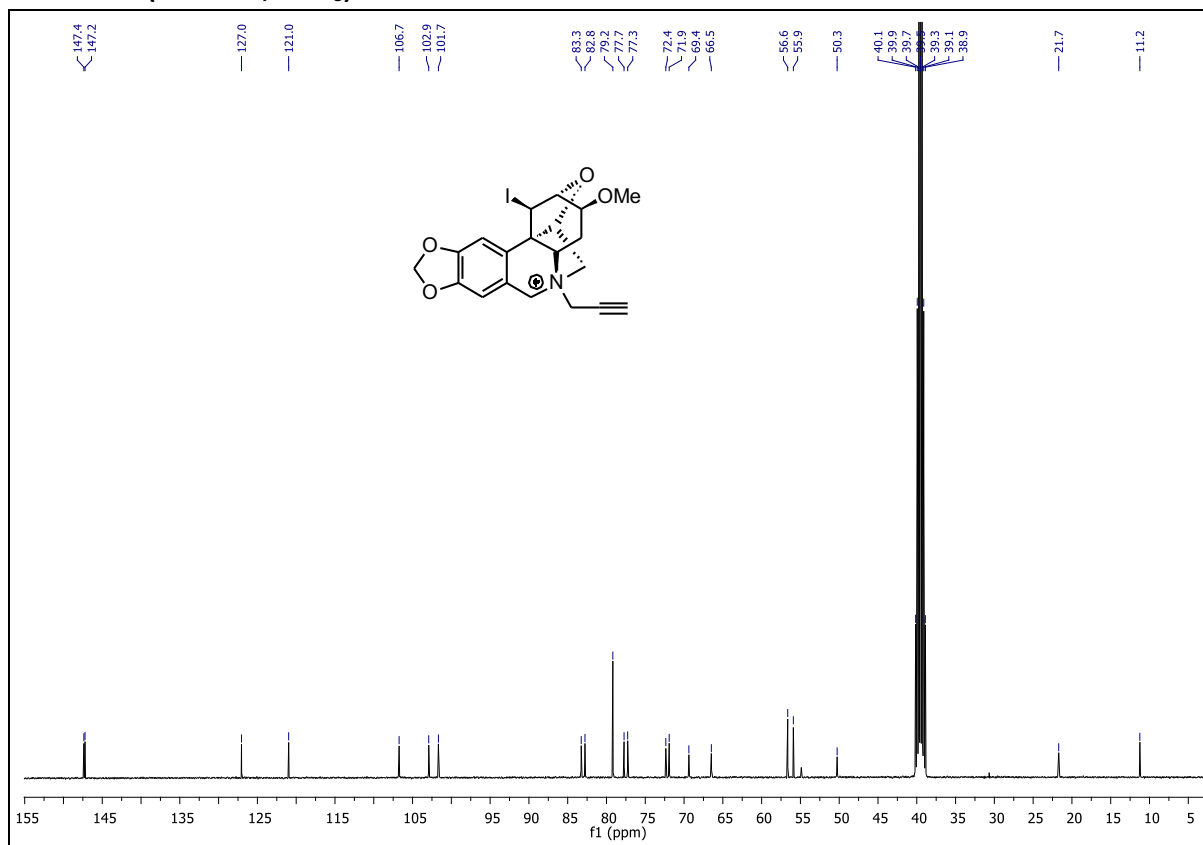

6: <sup>1</sup>H NMR (400 MHz, CDCl<sub>3</sub>)

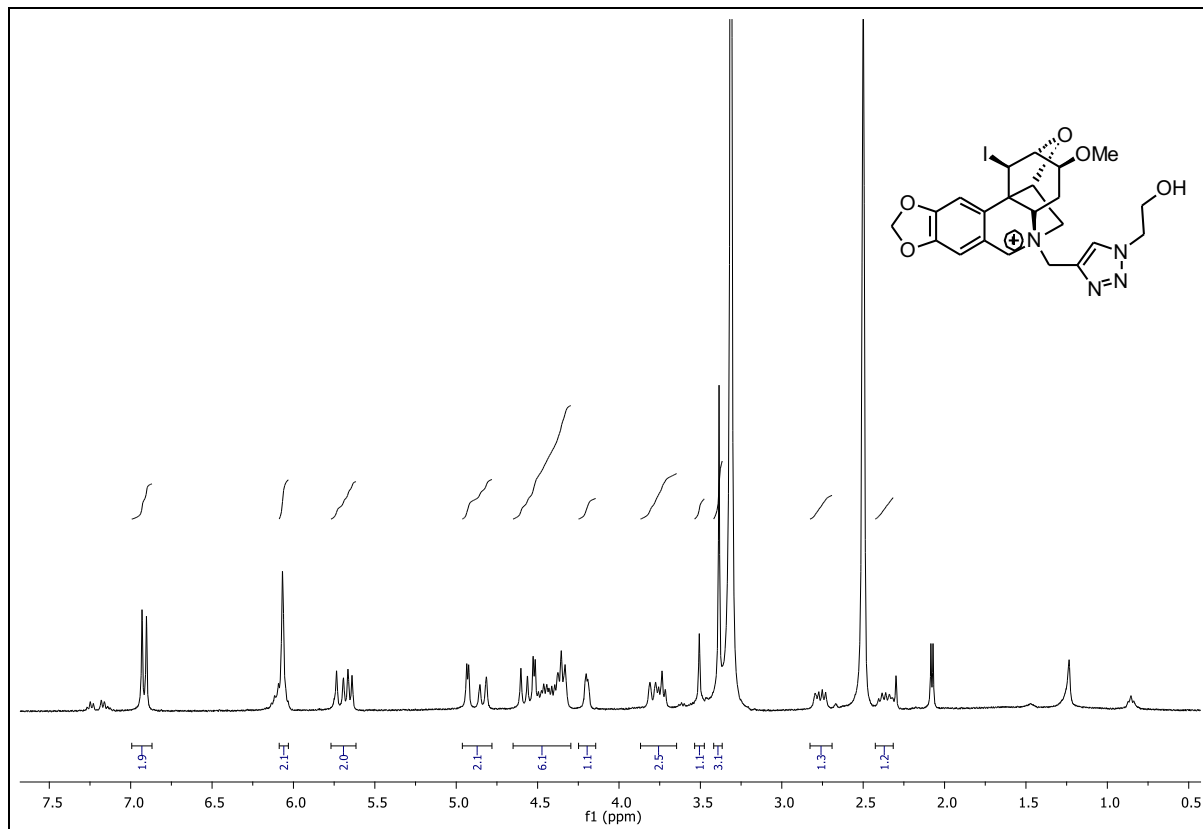

6: <sup>13</sup>C NMR (100 MHz, CDCl<sub>3</sub>)

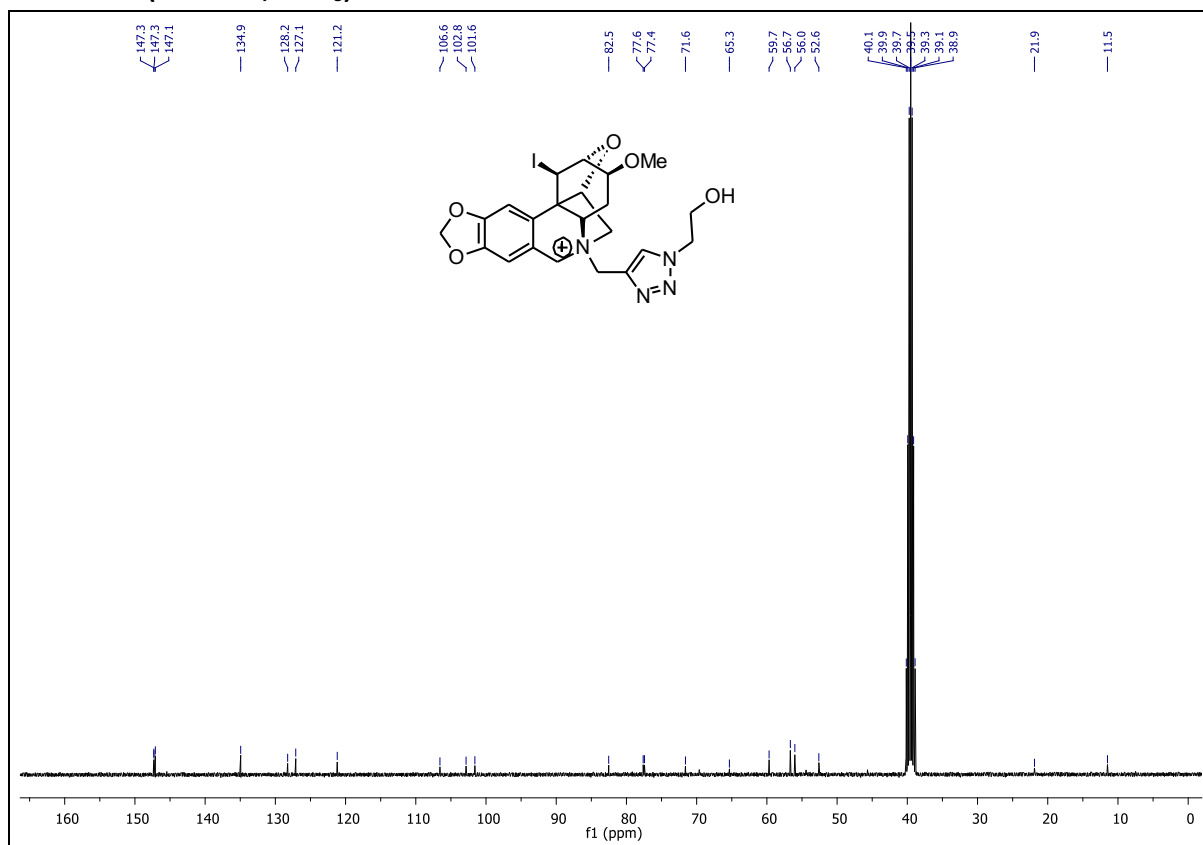

7:  $^1\text{H}$  NMR (400 MHz,  $\text{CDCl}_3$ )

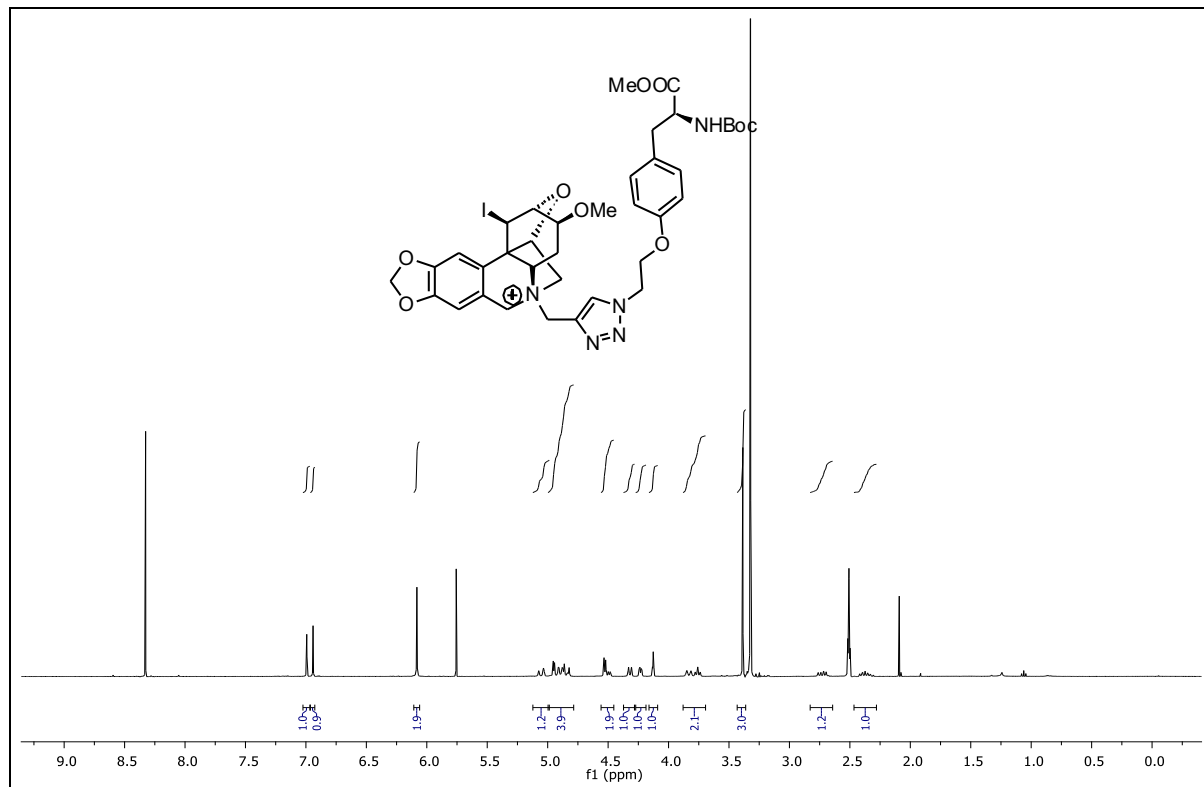

7:  $^{13}\text{C}$  NMR (100 MHz,  $\text{CDCl}_3$ )

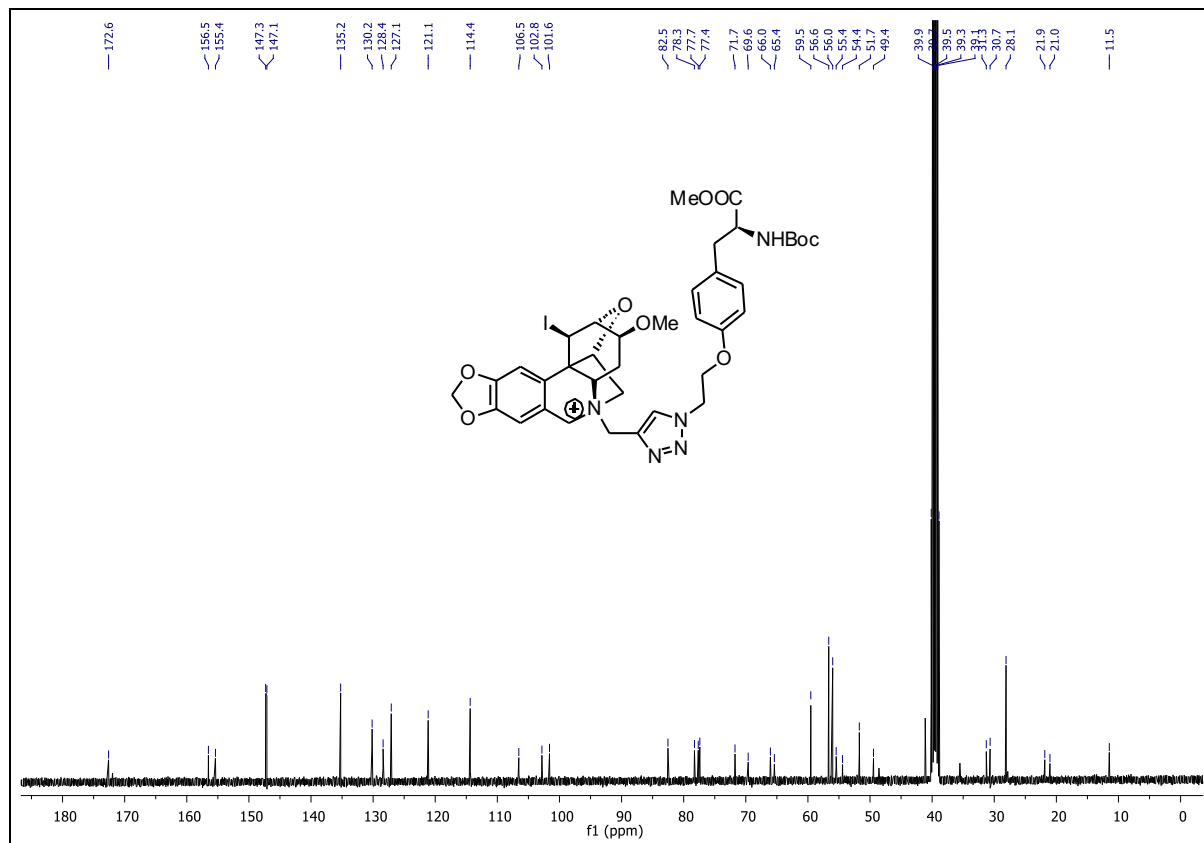

9:  $^1\text{H}$  NMR (400 MHz,  $\text{CDCl}_3$ )

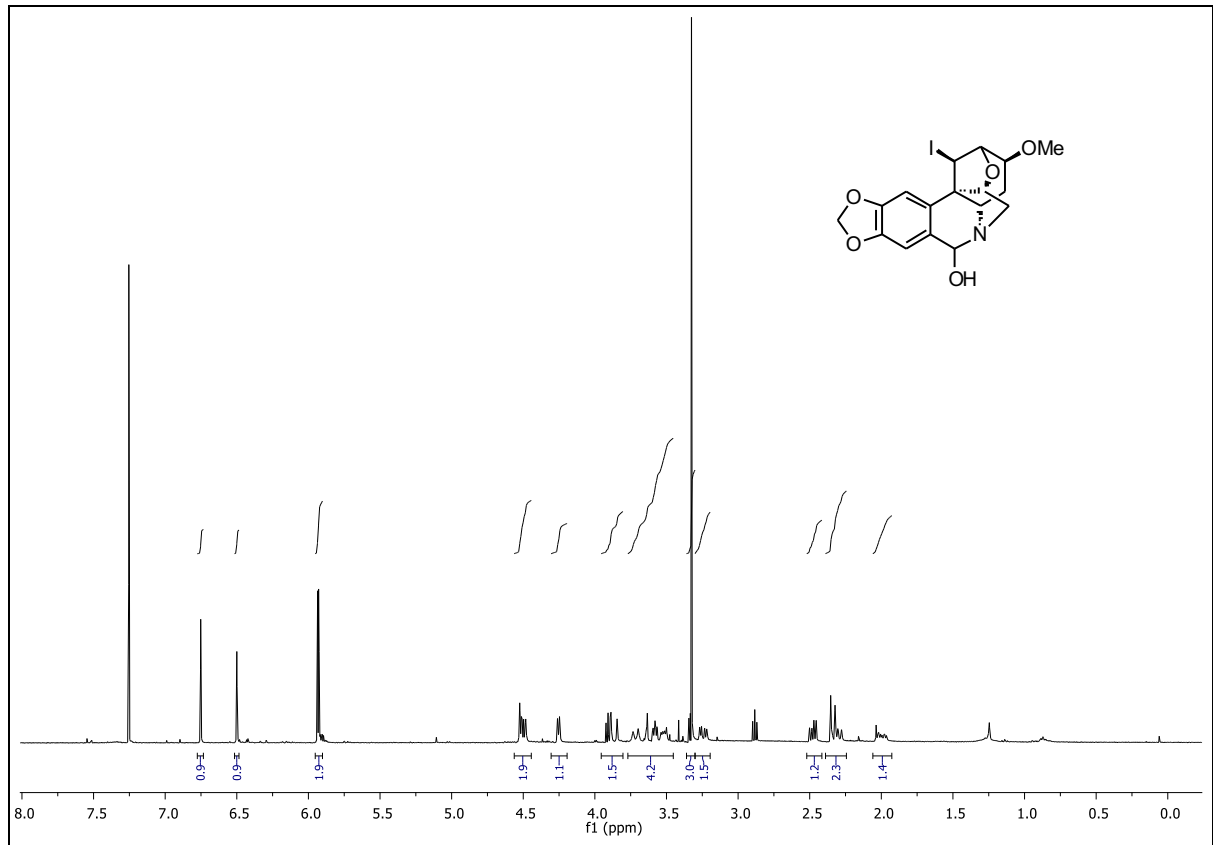

Supplement: molecules-23-00255-s001.pdf [file molecules-23-00255-s001.pdf]
